# Supplementary material for: Incidence of Cerebral Palsy in Korea and the Effect of Socioeconomic Status: A Population-Based Nationwide Study
Source: PubMed Central journal article supplement — Yonsei Med J. 2018 Jul 4;59(6):781–6. doi: 10.3349/ymj.2018.59.6.781 (PMC6037601; doi:10.3349/ymj.2018.59.6.781), 2018-07-04
Supplement: ymj-59-781-s001.pdf [file ymj-59-781-s001.pdf]

**Supplementary Table 1.** Disease Codes from ICD-10

| <b>Disease</b>             | <b>ICD-10</b>                        |
|----------------------------|--------------------------------------|
| Spastic cerebral palsy     | G800-802, G810, G811, G819, G830-833 |
| Dyskinetic cerebral palsy  | G803                                 |
| Ataxic cerebral palsy      | G804                                 |
| Unspecified cerebral palsy | G808                                 |
| Prematurity                | P072-073                             |
| Low birth weight           | P070-071                             |

ICD-10, the International Classification of Disease, 10th edition.
